# Supplementary material
Source: ML conference proceedings conference paper supplement (https://openaccess.thecvf.com/content/ICCV_2019/html/Logothetis_A_Differential_Volumetric_ICCV_2019_paper.html)
Supplement: Supplementary file 1 [file Logothetis_A_Differential_Volumetric_ICCV_2019_supplemental.pdf]

Archive with 2 entries (2 files):
- 5099-supp.pdf
- results_youtube.txt
