# Supplementary material
Source: ML conference proceedings conference paper supplement (https://openaccess.thecvf.com/content/ICCV_2019/html/Logothetis_A_Differential_Volumetric_ICCV_2019_paper.html)
Supplement: Supplementary file 1 [file Logothetis_A_Differential_Volumetric_ICCV_2019_supplemental.pdf › 5099-supp.pdf]

# A Differential Volumetric Approach to Multi-View Photometric Stereo Supplementary Material

Fotios Logothetis<sup>1,2</sup>, Roberto Mecca<sup>2</sup>, Roberto Cipolla<sup>1</sup>

fl302@cam.ac.uk, roberto.mecca@crl.toshiba.co.uk, rc10001@cam.ac.uk

<sup>1</sup>Department of Engineering, University of Cambridge, United Kingdom

<sup>2</sup>Toshiba Research, Cambridge, United Kingdom

## A. Octree Implementation

In this section, we provide some supplementary information about the octree used in order to manage our volumetric data. We construct a hierarchical structure where each node has a position in space (referred as  $\mathbf{x}$  in the main paper), a voxel size  $s$  (used to determine the projection into image planes for calculating  $i(\mathbf{x})$ , see Figure A), a signed distance value  $d(\mathbf{x})$  as well as 8 pointers to the children nodes of the next level (which can be null in case of a leaf node). A simple node illustration can be seen in Figure B.

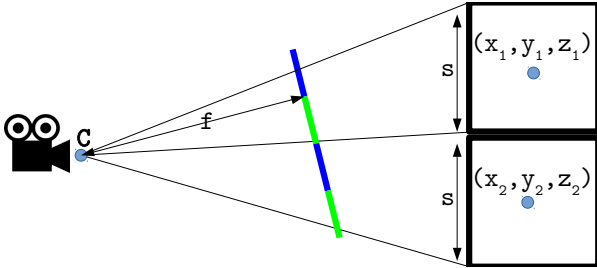

Figure A. Discretising the volume into a set of voxels with finite size  $s$  is imperative for determining correspondence to pixels in order to perform linear interpolation and thus determine  $i(x, y, z)$ . This is shown by colouring successive pixels on the image plane with different colours, in order to emphasise the possibility of 1 to many mapping between voxels and pixels. Note that  $\mathbf{C}$  is the camera center and  $f$  the focal length of the camera. If the voxel projection on the image plane is smaller than 1 pixel, this means that the limit of precision has been achieved and the reconstruction can be terminated.

### A.1. Ray-tracing complexity

One of the main motivations for the volumetric approach is that it allows for very fast visibility estimations, especially when implemented as an octree. Indeed, assuming a voxel grid of dimension  $N \times N \times N$ , then the number of voxels around the surface are expected to be  $\mathcal{O}(N^2)$ . Then, for each voxel, visibility calculations only require examining  $\mathcal{O}(\log N)$  (as illustrated in the caption of Figure 3(b)) as

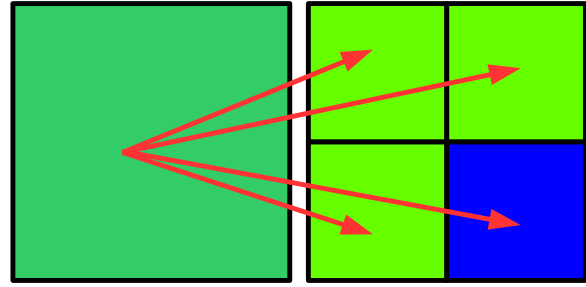

Figure B. A simple octree node illustration. A node simply contains the information of a 3D cube (position, size), a SDF value (coded with the colour here; green is positive, blue is negative) as well as pointers to next level nodes corresponding to subdividing the box in all 3 dimensions (this 2D figure only shows 4 children nodes but in reality they are 8).

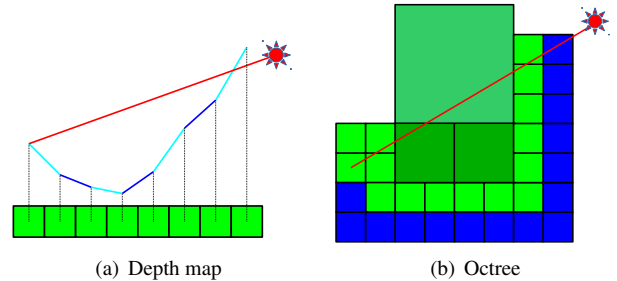

Figure C. Illustration of how the proposed octree SDF parameterisation accelerates ray-tracing compared to fixed resolution parameterisations. In (b), shades of green denote voxels with positive  $d$  and shades of blue denote those with negative  $d$ . An occlusion is detected when the tracing of the red ray moves from a green to a blue voxel and thus it means that it has intersected the surface. As the size of the voxels is variable, fewer of them need to be examined in contrast to (a), where the ray is traced on a fixed resolution depth map.

opposed to  $\mathcal{O}(N)$  operations for a dense volume/ depth map parameterisation or  $\mathcal{O}(N^2)$  operations required in a mesh-

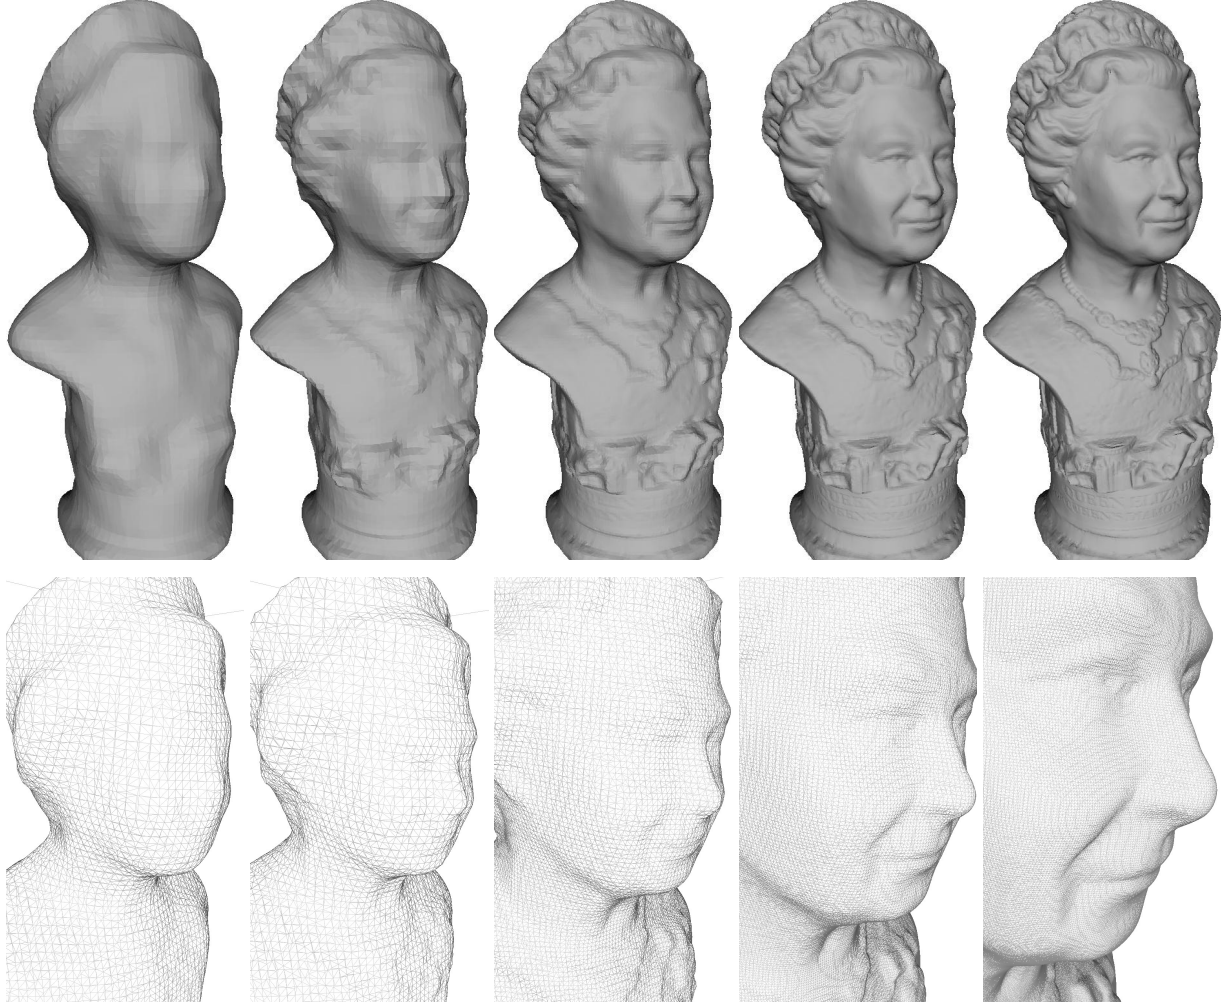

Figure D. Incremental refinement of the geometry from initial estimate (*left*) to final (*right*). (*top row*) shows an overall rendering of the object and the (*bottom row*) shows a closeup of the triangle mesh, emphasising the precision. At each step, the voxel size is halved, thus going from 1.38mm (both the initial estimate and the first iteration are at that resolution) to 0.69mm to 0.35mm to 0.17mm. Note that it is not required to perform marching cubes to extract the surface after each iteration; it is only done for illustration purposes here.

parameterisation framework (i.e. check all ray-box intersections).

Thus the total complexity is  $\mathcal{O}(N^2 \log N)$  as opposed to  $\mathcal{O}(N^3)$  for dense depth map parameterisation (e.g. [1]) and  $\mathcal{O}(N^4)$  in mesh parameterisation (e.g. [2]). In practice, for the Queen and Buddha datasets (Figures 6 and 7 in the main paper), the tree reached level 10 hence<sup>1</sup>  $N = 2^{10} = 1024$  thus the speedup compared to the other parameterisations is around  $\times 100$  and  $\times 10^5$  respectively. In practice, raytracing visibilities as well as cast shadows to all the views took only a few minutes on these datasets.

<sup>1</sup>The other two datasets in Figures 1 and 10 cover a bigger volume so it was needed to expand the tree to level 11.

## A.2. Incremental surface reconstruction

In this section we present an illustration of increase of surface quality after each voxel subdivision step. Figure D shows the different level of details that are encoded at each tree level. For this example, the octree was initialised with depth 7 and after 3 subdivision steps reached depth 10, reducing the voxel size by a factor of 8 and increasing the voxel count from around 96K to around 4.2M. The resulting final surface consists of 1.1M vertices and 2.2M triangles.

## References

- [1] F. Logothetis, R. Mecca, and R. Cipolla. Semi-calibrated near field photometric stereo. In *CVPR*, 2017. 2
- [2] J. Park, S. N. Sinha, Y. Matsushita, Y. W. Tai, and I. S. Kweon. Robust multiview photometric stereo using planar mesh parameterization. *PAMI*, 2017. 2
