# Supplementary material
Source: ML conference proceedings conference paper supplement (https://openaccess.thecvf.com/content/ICCV_2019/html/Logothetis_A_Differential_Volumetric_ICCV_2019_paper.html)
Supplement: Supplementary file 1 [file Logothetis_A_Differential_Volumetric_ICCV_2019_supplemental.pdf › results_youtube.txt]

https://www.youtube.com/watch?v=KGtWI5WYXKY&feature=youtu.be
